# Supplementary material for: Increase in salivary oxytocin and decrease in salivary cortisol after listening to relaxing slow-tempo and exciting fast-tempo music
Source: PLoS One. 2017 Dec 6;12(12):e0189075. doi: 10.1371/journal.pone.0189075 (PMC5718605; doi:10.1371/journal.pone.0189075)
Supplement: S2 File — This includes all the rating scores for music pieces assessed by 6 music experts. (XLSX) [file pone.0189075.s006.xlsx]

## Sheet: Sheet1
Feature assessment by music experts
	tune name		tempo	rhythm	pitch level	pitch range	harmonic complexity	consonance
slow tempo	Berceuse	sub 1	7.5	7.5	7.5	7.5	7.5	7.5
		sub 2	2.6	4.3	10.3	12.1	6.2	11.3
		sub 3	2	10	8	10	11	7
		sub 4	2.5	10	7.5	10	8	12
		sub 5	3.2	8.8	7.8	9.2	9.3	10.2
		sub 6	3.7	9.1	10.6	7	5.3	11.7
	Nocturne No. 8	sub 1	6.5	7.4	6.9	6.9	7.3	7.3
		sub 2	4.6	7.1	7.2	10	10.3	7.1
		sub 3	3	11	5	6	12	5
		sub 4	2	11	8	9	9	13
		sub 5	3.8	10.3	7.8	7.1	8.5	9.5
		sub 6	4.6	8	10.2	6.8	6.3	11.1
	Nocturne No. 18	sub 1	4.5	7.2	6.8	6.5	7.2	6.1
		sub 2	7.4	7.4	6.2	7.7	8.8	8.8
		sub 3	7	13	8	12	9	7
		sub 4	4	8	7	7	9	9
		sub 5	2.1	10.4	5.6	8.5	7.8	8.9
		sub 6	2.4	9.9	9.8	11.1	9.5	9
	Andante spianato	sub 1	6.1	6.1	9.5	9.5	6.9	7.2
		sub 2	3	6.7	12.2	7.7	5.1	12.4
		sub 3	7	9	10	7	5	10
		sub 4	3	12.5	9	9	8	12
		sub 5	5.1	9.1	10.7	7.2	6.1	12.4
		sub 6	4.2	7.6	9.4	10.4	6.2	5.2
fast tempo	Etude No. 1	sub 1	10.9	10.7	7.6	9	8.1	7.3
		sub 2	13.7	13.4	12	12.1	3.2	11.3
		sub 3	13	5	12	7	5	12
		sub 4	10	7	8	12	9	7
		sub 5	14.2	4.1	7.5	11.8	7.2	5.8
		sub 6	6.4	10.4	7.4	12.7	5.1	11.6
	Etude No. 5	sub 1	10.9	9.9	9.2	7.7	7.2	7.6
		sub 2	11.1	10.9	10.8	10.8	2.5	11.3
		sub 3	12	2	13	12	5	10
		sub 4	11	9	10	8	9	10
		sub 5	8	5.2	11.4	5.1	4.5	9.2
		sub 6	9	10	7.5	12.3	8.7	10.5
	Waltz No. 1	sub 1	7.8	7.7	7.8	7.7	7.6	7.5
		sub 2	9.1	11.5	8.2	8.2	10.4	4.8
		sub 3	9	9	8	12	9	9
		sub 4	8	12	7	8	8	11
		sub 5	8.6	9.2	6.1	10.3	7.5	11.1
		sub 6	9.5	10.6	9.7	9.7	7.5	11.4
	Waltz No. 4	sub 1	11.7	9.5	7.9	7.9	6.9	7.5
		sub 2	12.2	11.3	10.4	7.4	3.2	11.3
		sub 3	14	7	10	10	8	9
		sub 4	11	11	10	8	9	12
		sub 5	14.5	6.4	7.9	13.4	8.9	9
		sub 6	9	8.8	9.7	8.7	6.9	10.8
	Waltz No. 5	sub 1	8	7.5	7.1	8.5	7	6.8
		sub 2	10.4	11.1	9.7	10.7	10.4	8.9
		sub 3	8	11	6	9	9	8
		sub 4	9	12	8	9	10	10
		sub 5	9.2	11.4	7.1	12	10.4	9.7
		sub 6	10.5	9.9	10.3	6.8	6.5	8.9
	Waltz No. 6	sub 1	10.6	9.6	8.3	7.4	7.5	7.5
		sub 2	12.5	12.4	12.5	7.7	2.3	12.2
		sub 3	12	8	12	10	7	10
		sub 4	9	11	8	8	8	13
		sub 5	8.9	10.8	7	10.3	7.5	10.3
		sub 6	8.5	8.2	10.2	9.1	5	12.1
	Mazurka No. 23	sub 1	8.1	8.2	6.8	6.8	7	6.8
		sub 2	11.3	13.3	9.9	7.2	2	11.7
		sub 3	11	5	7	8	7	8
		sub 4	10	9	7	8	7	10
		sub 5	7.9	6.4	5.8	8.2	8	7.6
		sub 6	5.1	7	6.8	6.2	8	9.8
